# Supplementary material for: Nocturnal production of N 2 O 5 and ClNO 2 in Delhi: driving factors and impacts
Source: Copernicus journal article supplement (doi:10.5194/egusphere-2026-73), 2026-02-03
Supplement: Supplementary file 1 [file egusphere-2026-73-supplement.pdf]

1 *Supporting Information of*

2 **Nocturnal production of N<sub>2</sub>O<sub>5</sub> and ClNO<sub>2</sub> in Delhi: driving factors and impacts**

3 Yijing Chen<sup>1,2</sup>, Cheng Wu<sup>2\*</sup>, Epameinondas Tsiligiannis<sup>2</sup>, Ravi Kant Pathak<sup>2,3</sup>, Jan B.  
4 C. Pettersson<sup>2</sup>, Harsh Raj Mishra<sup>2,3†</sup>, Gazala Habib<sup>4</sup>, Geetam Tiwari<sup>5</sup>, Kebin He<sup>1</sup>,  
5 Jingkun Jiang<sup>1\*</sup>, Mattias Hallquist<sup>2\*</sup>

6 **Affiliations:**

7 <sup>1</sup>State Key Laboratory of Regional Environment and Sustainability, School of  
8 Environment, Tsinghua University, School of Environment, Tsinghua University;  
9 Beijing, 100084, China.

10 <sup>2</sup>Department of Chemistry and Molecular Biology, University of Gothenburg;  
11 Gothenburg, 40530, Sweden.

12 <sup>3</sup>Indo-Gangetic Plains Centre for Air Research and Education (IGP-CARE), Hamirpur,  
13 Uttar Pradesh, 210301, India.

14 <sup>4</sup>Transportation Research and Injury Prevention Centre, Indian Institute of Technology  
15 Delhi, New Delhi, 110016, India.

16 <sup>5</sup>Department of Civil Engineering, Indian Institute of Technology Delhi, New Delhi,  
17 110016, India.

18 †Present address: School of Earth and Atmospheric Sciences, Queensland University  
19 of Technology, Queensland, 4001, Brisbane, Australia.

20

21 **\*Correspondence to:** Mattias Hallquist (hallq@chem.gu.se), Jingkun Jiang  
22 (jiangjk@tsinghua.edu.cn) and Cheng Wu (cheng.wu@gu.se).

23

24

25 **This PDF file includes:**

26 Text S1 to S3

27 Figures S1 to S20

28 Tables S1 to S3

29

30

## Supplementary Text

### Text. S1 Details of field measurements in Delhi

#### 1.1 FIGAERO-I-CIMS configurations

The reagent ions ( $I^-$  and  $I \cdot H_2O^-$ ) were produced by passing  $\sim 2$  lpm ultrahigh purity (UHP)  $N_2$  via a  $CH_3I$  permeation tube and through a Po-210 ion source, where it interacted with the sampled air or thermally desorbed molecules from  $PM_{2.5}$  in the ion-molecular reactor (IMR). A constant 10 sccm of  $H_2O$ -saturated UHP was added directly into the IMR to reduce the sensitivity variability with ambient RH. The IMR pressure was maintained at 200-250 mbar during gas sampling and 120-140 mbar during  $PM_{2.5}$  desorption. The relatively lower pressure during the  $PM_{2.5}$  measurement was likely caused by the resistance and associated pressure drop across the filters. Considering the differences in IMR pressures, we conducted sensitivity calibrations for the gas- and particle-phase measurements separately under conditions similar to the field observations in Delhi. The average mass resolution was  $\sim 3500$  at  $m/z$  127.

For the gas-phase measurements, ambient air was drawn at 3 lpm through a 4-m-long PFA tube (inner diameter, 5 mm, residence time 1.6 s) with 2 lpm pumped away, and the remaining 1 lpm was diluted with 1 lpm UHP  $N_2$  before entering the IMR to avoid reagent ions titration by high levels of pollutants (e.g.,  $HNO_3$ ) in the ambient air. The inlet was flushed with  $\sim 2$  lpm UHP  $N_2$  during the first and last two minutes of each 20-min gas-phase measurement to obtain background signals, while ambient sampling was performed during the remaining period. The signals from the second zeroing period were used as the background, since those from the first zeroing period may have been influenced by carryover desorption signals (especially for sticky compounds) from the preceding particle-phase measurement (**Fig. S5**). The background-subtracted and dilution ratio (a factor of 2) corrected ion signals were subsequently averaged to 1-hour intervals. For  $PM_{2.5}$  measurements, ambient air was drawn at 3 lpm through a 4-m-long copper tube (inner diameter, 5 mm) fitted with a  $PM_{2.5}$  cyclone during the gas-sampling period, with 2 lpm discarded and 1 lpm collected on a Teflon filter for 20 min. The filter was then moved to the desorption position, where it was thermally desorbed and carried into the IMR under a 2 lpm flow of UHP  $N_2$ . The  $N_2$  flow was gradually ramped from room temperature to 200 °C in 20 min, soaked at 200 °C for 20 min, and finally cooled back to room temperature in 10 min. The particle phase signal was integrated over the temperature ramping and soaking period during filter desorption. The baseline was determined from linear fitting of the signal between the onset of heating and the end of soaking and was integrated and subtracted from the integrated desorption signals.

#### 1.2. Sensitivity calibrations of $N_2O_5$ , $ClNO_2$ and related species

*$N_2O_5$  and  $ClNO_2$ .*  $N_2O_5$  was prepared by mixing  $O_3$  with excessive  $NO_2$  to promote

the conversion of  $\text{NO}_3$  to  $\text{N}_2\text{O}_5$ . The generated  $\text{N}_2\text{O}_5$  concentrations were determined by the change in  $\text{O}_3$  following the addition of  $\text{NO}_2$ , and different  $\text{N}_2\text{O}_5$  levels was achieved via varying  $\text{O}_3$  concentration (Bertram et al., 2009). The produced  $\text{N}_2\text{O}_5$  was further diluted with humidified zero air to approximate Delhi RH conditions before entering the CIMS.  $\text{ClNO}_2$  was produced by passing a known amount of  $\text{N}_2\text{O}_5$  through a wetted  $\text{NaCl}$ -slurry placed in a Teflon tube, assuming a unit conversion from  $\text{N}_2\text{O}_5$  to  $\text{ClNO}_2$  (Finlayson-Pitts, 2003). All the tubings are covered by aluminum foil to avoid  $\text{NO}_3$  photolysis and were flushed with dry zero air overnight before calibration to minimize potential  $\text{N}_2\text{O}_5$  hydrolysis on the tubing surfaces. No water-dependent sensitivity correction was applied for  $\text{N}_2\text{O}_5$  and  $\text{ClNO}_2$ , as no significant sensitivity variation was observed in the range of  $\text{H}_2\text{O}\cdot\text{I}^-/\text{I}^-$  ratios during the field measurements in Delhi. The calibration curve for  $\text{N}_2\text{O}_5$  and  $\text{ClNO}_2$  are shown in **Fig. S19a-b**.

*HCl and chloroacetic acid.* A certified 10 ppm  $\text{HCl}$  gas cylinder (Linde Specialgas) was used as the standard source, which was diluted with zero air to different mixing ratios before introducing to the CIMS (**Fig. S19c**). Notably, we observed a significant decrease of the  $\text{HCl}$  sensitivity at high  $\text{H}_2\text{O}\cdot\text{I}^-/\text{I}^-$  ratios (**Fig. S19d**), likely due to the competing effects of  $\text{H}_2\text{O}$  for clustering with iodide anion and that the reaction of  $\text{HCl}$  with  $\text{H}_2\text{O}\cdot\text{I}^-$  is thermodynamically less favorable compared to reacting with iodide anion. The slight increase in  $\text{HCl}$  sensitivity with increasing  $\text{H}_2\text{O}\cdot\text{I}^-/\text{I}^-$  ratio at low RH levels may be related to the stabilization of  $\text{HCl}\cdot\text{I}^-$  clusters by water vapors. Similar patterns have been reported for other acids in a previous study (Lee et al., 2014). Gaseous chloroacetic acid was generated by placing solid chloroacetic acid in a glass vial submerged in a 30 °C water bath. The emission rate, determined by gravimetric weight loss analysis, was 177.3 ng/min. No significant  $\text{H}_2\text{O}$  dependence of chloroacetic acid sensitivity was observed.

*Levogluconan.* A certain amount (10~90 ng) of levoglucosan dissolved in acetone solutions was deposited on the filter of the CIMS, and then the droplet underwent the same thermal desorption cycle as in the field measurements. The sensitivity for levoglucosan was derived as the integrated background-subtracted signals divided by the deposited mass.

### 1.3. Supporting measurements and data quality control

Meteorological factors, i.e., T, RH, wind speed, and wind direction, were measured by an automated weather station (AWS) (Davis Vantage Pro 2, Davis Instruments Corporation, USA). Trace gases, including  $\text{O}_3$ ,  $\text{NO}$  and  $\text{NO}_2$ ,  $\text{CO}$ , and  $\text{SO}_2$  were measured by on-line gas analyzers (ECOTECH Serinus). For the long-term (2017~2024) hourly observation data obtained from R.K. Puram station, we applied rigorous quality

controls following recent studies (Vohra et al., 2025; Xie et al., 2024) with a few modifications, including (1) Remove duplicates: In sequences of five or more consecutive identical hourly values, only the first value out of the sequence is retained, (2) Remove outliers: For a 24-h running window, flag any observation as an outlier if its absolute difference from the median exceeds three times the Median Absolute Deviation (MAD, median distance between each observation and the median of all observations), (3) Remove constant data: In a 24-h running window, remove constant data values with coefficient of variation (ratio of standard deviation to the mean) less than 5%, (4) Validation of NO, NO<sub>2</sub> measurements by comparing with the measured NO<sub>x</sub>: consider NO and NO<sub>2</sub> are reported correctly in unit of µg/m<sup>3</sup> and assess if NO<sub>x</sub> calculated from these is within 2% of reported NO<sub>x</sub> + 2.5 ppb. If not, the measured NO, NO<sub>2</sub>, and NO<sub>x</sub> data were omitted.

## **Text. S2 Estimation of the N<sub>2</sub>O<sub>5</sub> uptake coefficient**

### **2.1 Inapplicability of the steady-state method**

The steady-state approximation of the NO<sub>2</sub>-NO<sub>3</sub>-N<sub>2</sub>O<sub>5</sub> system is a widely applied method (Brown et al., 2003) for estimating the values for the NO<sub>3</sub> and N<sub>2</sub>O<sub>5</sub> sinks (thereby  $\gamma_{N_2O_5}$ ) in various atmospheric environments (Brown et al., 2006; Wang et al., 2017b; Wang et al., 2017a). This method assumes that production rate of NO<sub>3</sub> and N<sub>2</sub>O<sub>5</sub> equals the sum of the loss rates during a certain period of the night (Eq. 1), and therefore  $k_{NO_3}$  and  $k_{N_2O_5}$  can be determined as the slope and intercept, respectively, of the linear fitting between  $\tau_{N_2O_5}^{-1}$  and  $\frac{1}{K_{eq}[NO_2]}$  (Eq. 2). However, we found no significant positive even negative correlation between  $\tau_{N_2O_5}^{-1}$  and  $\frac{1}{K_{eq}[NO_2]}$  during the nighttime throughout the campaign (an example is shown in **Fig. S20**). This is likely attributed to the intense and variable NO<sub>x</sub> emissions in Delhi (avg. nighttime hourly NO<sub>x</sub> mixing ratios of 92±60 ppb) which preclude the system from approaching steady-state on the time-scale of a night. As is shown in **Fig. 2a** of the main text, N<sub>2</sub>O<sub>5</sub> presented a strong negative dependence on NO. The high concentrations and large fluctuations of NO dominated the variation of N<sub>2</sub>O<sub>5</sub>, thereby decoupling the lifetime of N<sub>2</sub>O<sub>5</sub> from  $\frac{1}{K_{eq}[NO_2]}$ .

$$k_{NO_2+O_3}[NO_2][O_3] = k_{NO_3}[NO_3] + k_{N_2O_5}[N_2O_5] \text{ (Eq. 1)}$$

$$K_{eq} = 2.7 \times 10^{-27} \times \exp(11000/T)$$

Substitute  $[NO_3] = \frac{[N_2O_5]}{K_{eq}[NO_2]}$  to Eq. 1, we get

$$\tau_{N_2O_5}^{-1} = \frac{k_{NO_2+O_3}[NO_2][O_3]}{[N_2O_5]} = \frac{k_{NO_3}}{K_{eq}[NO_2]} + k_{N_2O_5} \text{ (Eq. 2)}$$

Where  $k_{NO_3}$  and  $k_{N_2O_5}$  are the pseudo-first-order loss rate constants of  $NO_3$  and  $N_2O_5$ , respectively,  $k_{N_2O_5} = \frac{\bar{c}\gamma}{4}S_a$ ,  $\tau_{N_2O_5}^{-1}$  is the inverse of the  $N_2O_5$  steady-state lifetime.

## 2.2 Validation of the RH parameterization method

$ClNO_2$  yield indicates the branching ratio of  $H_2ONO_2^+$  reacting with  $H_2O$  (R4) and chloride (R5), which is theoretically determined by the respective reaction rates shown in Eq. 3 (Bertram and Thornton, 2009).

$$f_{ClNO_2} = \frac{k_{R5}[H_2ONO_2^+][Cl^-]}{k_{R5}[H_2ONO_2^+][Cl^-] + k_{R4}[H_2ONO_2^+][H_2O]} = \frac{1}{1 + \frac{k_{R4}}{k_{R5}} \frac{[H_2O]}{[Cl^-]}} \text{ (Eq. 3)}$$

Where  $[H_2O]$  and  $[Cl^-]$  are concentrations in the aqueous phase of particles derived from thermodynamic models,  $k_{R5}$  and  $k_{R4}$  are reaction rate coefficients of Reaction R5 and R4. The experimentally determined values for  $\frac{k_{R5}}{k_{R4}}$  is  $483 \pm 175$  from the work of Bertram and Thornton (Bertram and Thornton, 2009) and  $836 \pm 32$  from Behnke et al. (Behnke et al., 1997). Due to the lack of aerosol inorganic composition (e.g.,  $NH_4^+$ ,  $NO_3^-$ , and  $SO_4^{2-}$ ) measurements during the 2023 campaign, we estimated the range of  $[Cl^-]/[H_2O]$  ratio from January to March in 2022 Delhi when ACSM measurements are available (Ali et al., 2025) and the measured chloride level was similar to the campaign in 2023. The estimated nocturnal (18:00–06:00)  $[Cl^-]/[H_2O]$  ratio ranged from  $1.8 \times 10^{-5}$  to 0.76 with an average of 0.07, which mostly fell in the region where the corresponding  $ClNO_2$  yield close to 1 (**Fig. S13a**). We therefore tested the validity of the RH parameterization method by simulating the average nocturnal variation of  $ClNO_2$  constrained with the parameterized gamma, observed  $N_2O_5$  mixing ratios and aerosol surface area concentrations, with the  $ClNO_2$  yield set to 1. The results showed that the simulation largely overestimated the production of  $ClNO_2$  from 20:00 to 00:00 (**Fig. S13b**) when the absolute chloride concentrations were relatively low (**Fig. 1d**). By comparison, when constraining  $ClNO_2$  yield to 0 for the chloride-deficient period (20:00 to 00:00) and 1 for the chloride-sufficient period (0:00 to 6:00), the modelled  $ClNO_2$  evolution well tracked the observations (**Fig. S13b**). The overall consistency between modelling and observations suggest that the measured  $ClNO_2$  can largely explained by the locally heterogeneous uptake of  $N_2O_5$  on chloride-rich particles in Delhi and that the RH-parameterized  $\gamma_{N_2O_5}$  is a reasonable estimate, indicating the key role of RH and thereby aerosol liquid water content in driving  $N_2O_5$  uptake in Delhi. Nevertheless, comprehensive aerosol composition measurements or direct

measurements of N<sub>2</sub>O<sub>5</sub> reactivity (Bertram et al., 2009; Li et al., 2025) in future studies are required to enable better quantification and understanding N<sub>2</sub>O<sub>5</sub> uptake processes in Delhi.

### **Text. S3 Estimation of ClNO<sub>2</sub> in the residual layer**

The nocturnal boundary layer typically comprised a surface layer and an overlying residual layer (RL), where the RL was isolated from ground emissions and preserved the chemical composition of the well-mixed boundary layer from the late-afternoon. To estimate the maximum ClNO<sub>2</sub> produced in the RL, we used the ground-observed average N<sub>2</sub>O<sub>5</sub> mixing ratios and aerosol surface area prior to sunset (16:00~18:00), assuming  $\gamma_{N_2O_5}=0.1$  and  $f_{ClNO_2}=1$  (Eq. 4). The calculation indicated that N<sub>2</sub>O<sub>5</sub> was fully consumed within 1 hour.

$$[ClNO_2]_{RL} = \int_{t_1}^{t_2} \frac{\bar{c}\gamma_{N_2O_5}}{4} S_a[N_2O_5]_{obs} f_{ClNO_2} dt \text{ (Eq. 4)}$$

197 **Table S1 Summary of nocturnal peak and average (shown in the brackets) N<sub>2</sub>O<sub>5</sub>**  
198 **and ClNO<sub>2</sub> mixing ratios measured around the world. The unit is ppt.**

| Location                                                           | Period         | Type          | N <sub>2</sub> O <sub>5</sub> | ClNO <sub>2</sub> | ref.                      |
|--------------------------------------------------------------------|----------------|---------------|-------------------------------|-------------------|---------------------------|
| India Institute of Technology, Delhi                               | 2023.2.23-3.14 | urban inland  | 556<br>(16)                   | 1340<br>(116)     | this study                |
| India Institute of Technology, Delhi                               | 2019.1.11-2.5  | urban inland  | 203<br>(4)                    | 724<br>(48)       | (Haslett et al., 2023)    |
| Gulf of Mexico, Huston, Texas                                      | 2006.7-9       | urban coastal | 750                           | 1200              | (Osthoff et al., 2008)    |
| National Oceanic and Atmospheric Administration, Boulder, Colorado | 2009.2.11-2.25 | urban inland  | 1500                          | 440               | (Thornton et al., 2010)   |
| University of Utah, Salt Lake City, Utah                           | 2015.12-2016.2 | urban inland  | 1520<br>(76)                  |                   | (Baasandorj et al., 2017) |
| University of Michigan, Ann Arbor, Michigan                        | 2016.2.1-3.10  | urban inland  |                               | 220               | (McNamara et al., 2020)   |
| Toronto                                                            | 2021.1.11-1.25 | urban inland  |                               | 300               | (Wang et al., 2023)       |
| Kensington                                                         | 2012.7 -8      | urban inland  | 1700                          | 724<br>(84)       | (Bannan et al., 2015)     |
| Manchester                                                         | 2014.10-11     | urban inland  |                               | 506               | (Priestley et al., 2018)  |
| Frankfurt Observatory (825 m a.s.l.)                               | 2011.8-9       | rural inland  | 3000                          | 800               | (Phillips et al., 2012)   |
| China, Wangdu                                                      | 2014.6-7       | rural inland  | 500                           | 2070              | (Tham et al., 2016)       |
| China, Wangdu                                                      | 2017.12        | rural inland  | 1000                          | 1400              | (Xia et al., 2021)        |
| China, Wangdu                                                      | 2023.2.10-3.5  | rural inland  |                               | 3600              | (Chen et al., 2025)       |
| China, mountain in Hong Kong (957 a.s.l.)                          | 2013.11-12     | mountain site | 7700                          | 4700              | (Wang et al., 2016)       |
| China, Heshan                                                      | 2017.1.2-1.15  | urban coastal | 3000                          | 8300              | (Chen et al., 2023)       |

**Table S2 Campaign-averaged NO<sub>3</sub><sup>•</sup> reactivity (unit: s<sup>-1</sup>) during the 2019 and 2023 campaign.**

|          | NO <sub>3</sub> + NO | NO <sub>3</sub> + hv | N <sub>2</sub> O <sub>5</sub> hete. | NO <sub>3</sub> + VOCs |
|----------|----------------------|----------------------|-------------------------------------|------------------------|
| 2019.1~2 | 50.175               | 0.031                | 0.462                               | 0.081                  |
| 2023.2~3 | 15.585               | 0.043                | 0.091                               | 0.081*                 |

\*assumed to be the same as those observed in 2019.

**Table S3 Average emission factor (g/kg fuel burned) of K, HCl, HCN, CO, and SO<sub>2</sub> from biomass, biofuel, and garbage burning processes and vehicles.**

|                    |                       | K           | HCl  | HCN  | SO <sub>2</sub> | CO  | HCl/CO               | ref                      |
|--------------------|-----------------------|-------------|------|------|-----------------|-----|----------------------|--------------------------|
| Biomass<br>burning | Peat                  | 0.004~0.015 | -    | 1.00 | -               | 38  | -                    | (Andreae, 2019)          |
|                    | Crop residues         | 0.48        | 0.18 | 0.42 | 0.8             | 77  | 2.3×10 <sup>-3</sup> | (Andreae, 2019)          |
|                    | Rice straw            | -           | 0.44 | 0.37 | 1.3             | 60  | 7.3×10 <sup>-3</sup> | (Stockwell et al., 2014) |
|                    | Wheat straw           | -           | 0.47 | 0.10 | 0.7             | 39  | 1.2×10 <sup>-2</sup> | (Stockwell et al., 2014) |
|                    | Tropical forest       | 0.32        | 0.13 | 0.44 | 0.8             | 104 | 1.3×10 <sup>-3</sup> | (Andreae, 2019)          |
|                    | Temperate forest      | 0.18        | 0.04 | 0.64 | 0.7             | 112 | 3.5×10 <sup>-4</sup> | (Andreae, 2019)          |
| Biofuel<br>burning | Dung                  | 0.09        | 0.04 | 1.30 | 0.7             | 89  | 4.3×10 <sup>-4</sup> | (Andreae, 2019)          |
|                    | Biofuels without dung | 0.13        | 0.08 | 0.39 | 0.5             | 84  | 8.9×10 <sup>-4</sup> | (Andreae, 2019)          |
|                    | Charcoal              | 0.75        | 0.11 | -    | 0.6             | 207 | 5.3×10 <sup>-4</sup> | (Andreae, 2019)          |
|                    | Wood                  | -           | 0.02 | 0.54 | bld             | 77  | 2.4×10 <sup>-4</sup> | (Stockwell et al., 2016) |



|                    |                                                |      |      |      |     |     |                      |                                 |
|--------------------|------------------------------------------------|------|------|------|-----|-----|----------------------|---------------------------------|
| Garbage<br>burning | Garbage<br>burning                             | 0.02 | 2.80 | 0.43 | 0.5 | 66  | 4.2×10 <sup>-2</sup> | (Andrea<br>e, 2019)             |
|                    | Mixed<br>plastic<br>garbage                    | -    | 2.30 | 0.43 | bld | 85  | 2.7×10 <sup>-2</sup> | (Stockw<br>ell et al.,<br>2016) |
|                    | Two-<br>wheeled<br>vehicles                    | -    | bld  | 0.68 | bld | 761 | -                    | (Stockw<br>ell et al.,<br>2016) |
| Vehicles           | Agricultur<br>al diesel<br>irrigation<br>pumps | -    | bld  | 0.12 | bld | 17  | -                    | (Stockw<br>ell et al.,<br>2016) |

Note: bld indicates below the limit of detection.

**Table S4 Summary of the bulk PM composition measured at IITD during winter from 2017 to 2022. The unit is µg/m<sup>3</sup>.**

| Period                          | PM                | Cl   | NO <sub>3</sub> | SO <sub>4</sub> | NH <sub>4</sub> | Org   | ref                           |
|---------------------------------|-------------------|------|-----------------|-----------------|-----------------|-------|-------------------------------|
| 2017.1~2017.3                   | PM <sub>1</sub>   | 14.2 | 16.1            | 15.8            | 15.7            | 81.0  | (Gani et al.,<br>2019)        |
| 2017.12~2018.3                  | PM <sub>1</sub>   | 18.9 | 19.6            | 11.1            | 15.9            | 99.9  | (Gani et al.,<br>2019)        |
| 2018.1.17~1.19<br>2018.2.5~3.11 | PM <sub>2.5</sub> | 20.4 | 13.3            | 12.0            | 14.3            | 65.3  | (Lalchandani<br>et al., 2021) |
| 2019.1.11~2.5                   | PM <sub>1</sub>   | 17.3 | 20.8            | 18.0            | 23.7            | 80.0  | (Haslett et<br>al., 2023)     |
| 2019.12.1~2020.1.5              | PM <sub>2.5</sub> | 5.7  | 14.5            | 11.4            | 9.5             | 60.9  | (Ali et al.,<br>2023)         |
| 2020.2.1~3.20                   | PM <sub>1</sub>   | 4.9  | 10.6            | 9.7             | 8.9             | 47.9  | (Mandariya<br>et al., 2024)   |
| 2020.12.15~12.31                | PM <sub>2.5</sub> | 11.3 | 27.2            | 13.7            | 25.7            | 111.5 | (Faisal et al.,<br>2025)      |

|                      |                   |      |      |      |      |      |                       |
|----------------------|-------------------|------|------|------|------|------|-----------------------|
| 2020.12.15~2021.2.23 | PM <sub>2.5</sub> | 4.9  | 19.8 | 15.5 | 15.7 | 96.2 | (Ali et al., 2023)    |
| 2021.1.1~2021.2.28   | PM <sub>2.5</sub> | 10.1 | 16.1 | 12.1 | 19.0 | 87.0 | (Faisal et al., 2025) |
| 2022.1.12~3.31       | PM <sub>2.5</sub> | 4.5  | 15.3 | 14.0 | 12.9 | 86.2 | (Ali et al., 2025)    |

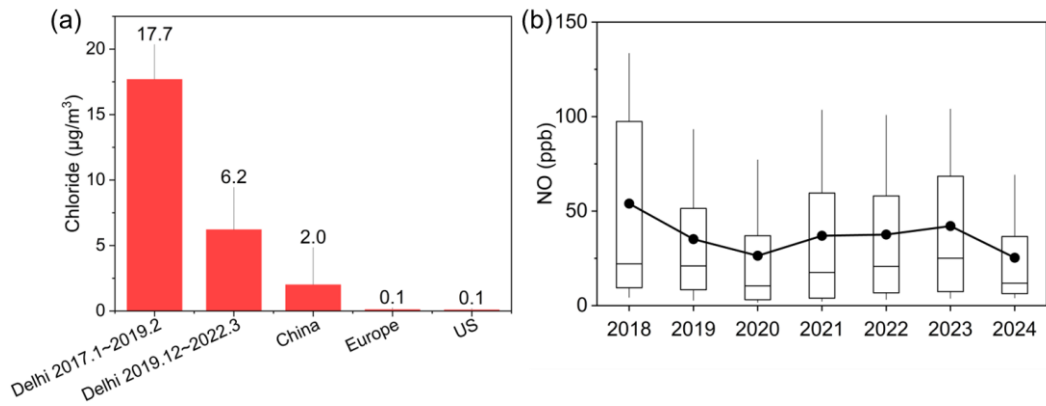

**Fig. S1 (a) Comparison of the observed chloride levels globally. (b) Box plots of the annual daily averages of NO concentrations in Delhi.** The chloride concentrations in Delhi (compiled from Table S4), China (Xia et al., 2021;Tham et al., 2018;Xia et al., 2020), Europe (Eger et al., 2019;Lanz et al., 2010), and US (Mielke et al., 2013;Sarwar et al., 2012) are campaign-average values retrieved from previous studies. The whiskers in (a) represent standard deviation. The NO concentrations shown in (b) were obtained from the R.K. Puram monitoring station. The boxes represent the interquartile range with the whiskers extending to the 10<sup>th</sup> and 90<sup>th</sup> percentiles. The dot and horizontal line within each box denote the mean and median values, respectively.

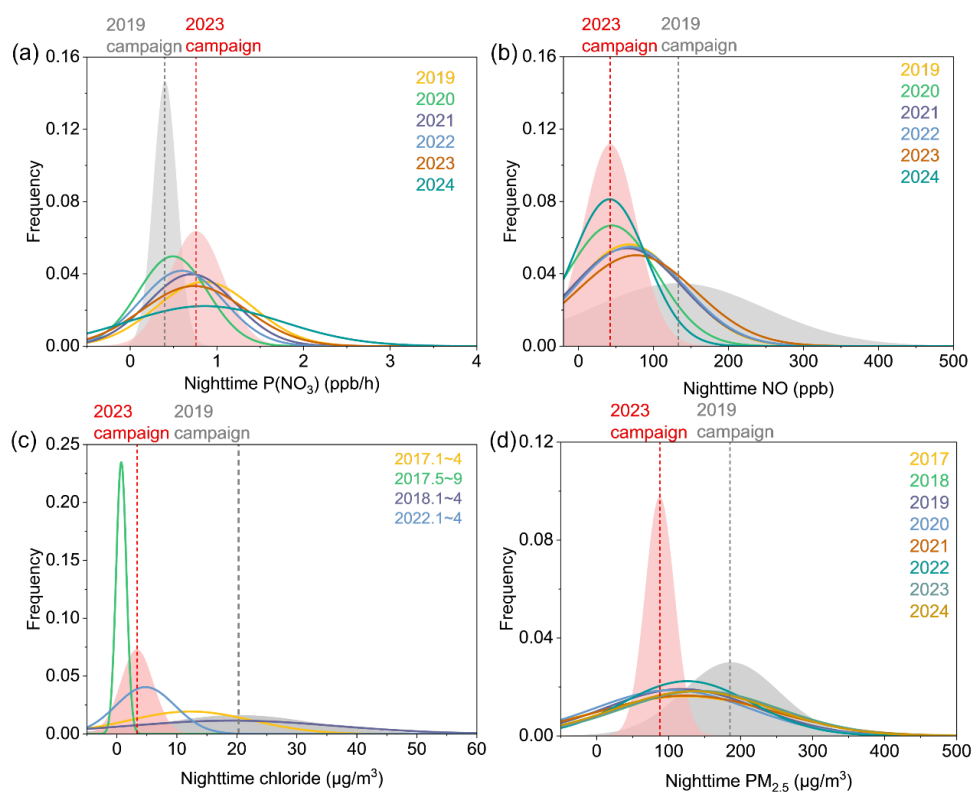

**Fig. S2 Representativeness of the two field-campaigns in Delhi.** Gaussian-fitted frequency distributions of nightly (a)  $P(NO_3)$ , (b) NO, (c) chloride, and (d)  $PM_{2.5}$  concentrations from 2017 to 2024. The nighttime is defined as 20:00~04:00 throughout the years. The data for  $P(NO_3)$ , NO, and  $PM_{2.5}$ , are obtained from the R.K. Puram monitoring station. Chloride concentrations were unavailable at the station and are retrieved from previous studies (Gani et al., 2019; Ali et al., 2025). The gray and red shaded area denote the respective pollutant distribution during the 2019 and 2023 campaign and the dashed lines indicate the campaign averages.

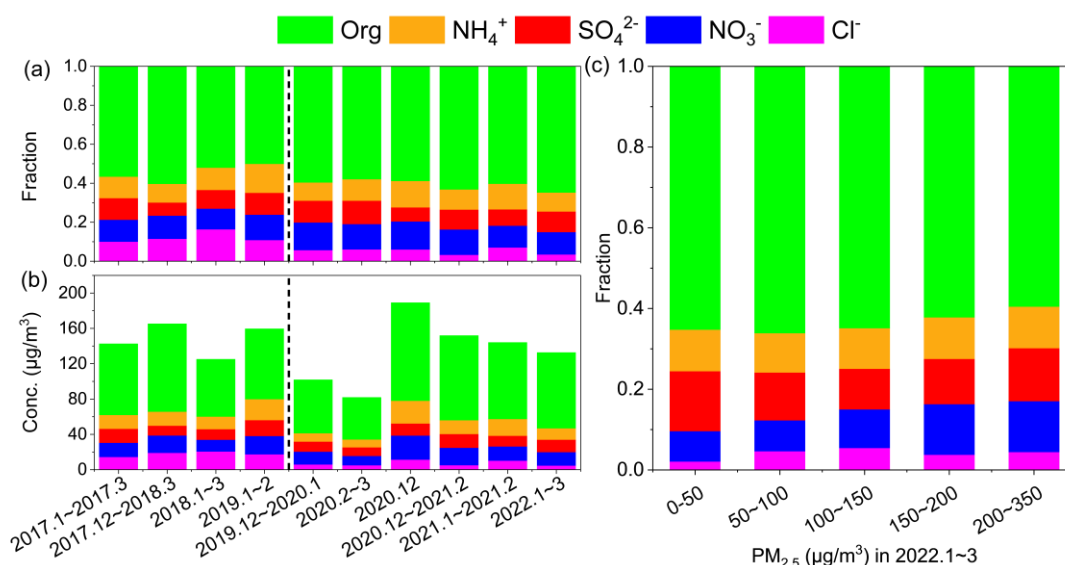

**Fig. S3 (a-b) Temporal trends in bulk PM composition measured at IITD during winter from 2017 to 2022. (c) Variations of the composition fractions under varying  $PM_{2.5}$  ranges.** The original data for (a-b) was compiled from previous studies based on ACSM or AMS measurements and shown in **Table S3**. The dashed vertical line in (a-b) indicates the end of 2019. The  $PM_{2.5}$  composition data in (c) was retrieved from Ali et al (Ali et al., 2025). and the corresponding  $PM_{2.5}$  mass concentrations were obtained from the nearby R.K. Puram station.

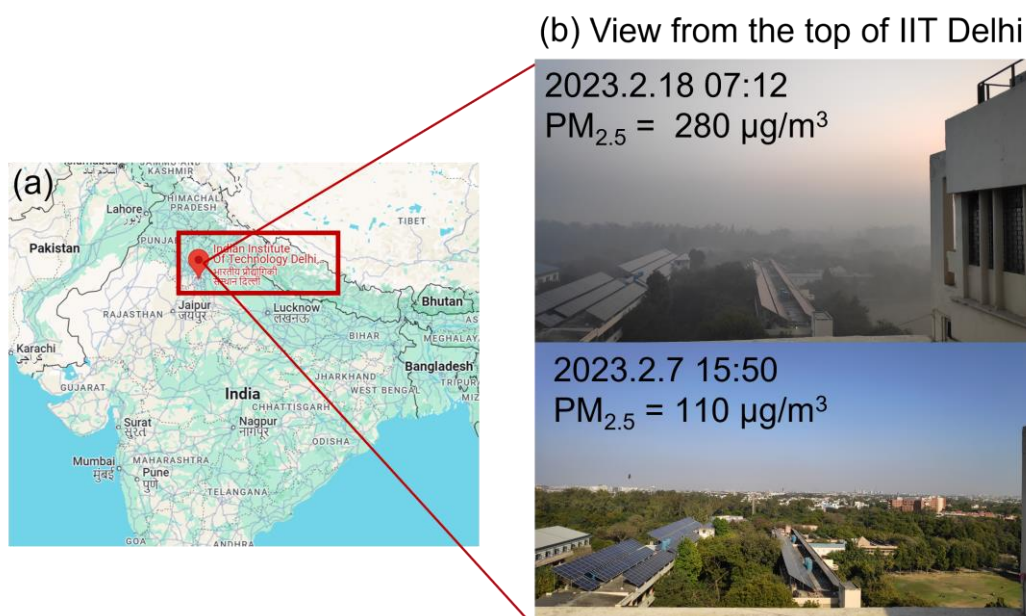

**Fig. S4 (a) The locations and (b) a zoom-in view of the sampling site.** The two photos in (b) were taken during the early morning and late afternoon hours, respectively. Map data © Google Maps 2026.

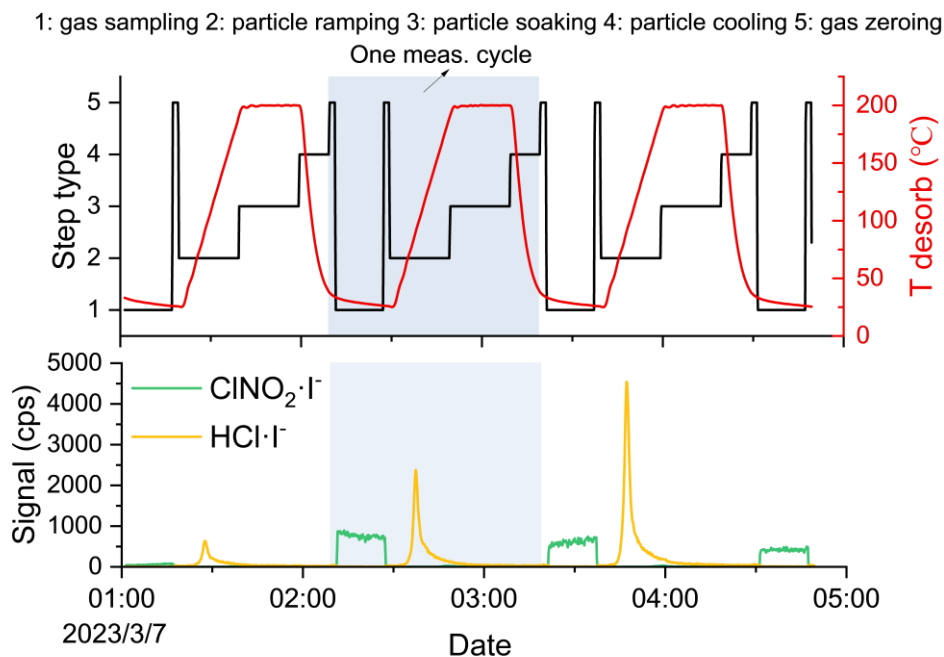

**Fig. S5 An example of the measurement cycle.**

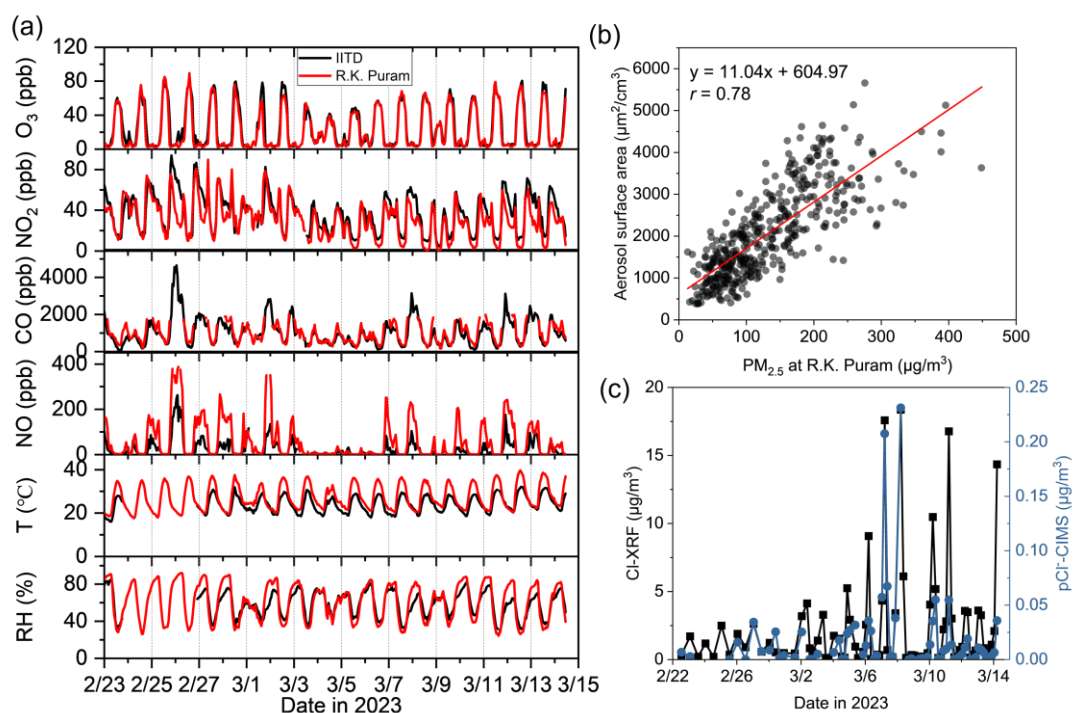

**Fig. S6 Intercomparison of the measured species and estimation of aerosol surface area.** (a) Comparison of the time series of trace gases and meteorological parameters measured at IIT Delhi and the R.K. Puram station in 2023 campaign. (b) Correlation between the measured aerosol surface area at IIT Delhi(Gani et al., 2020) and PM<sub>2.5</sub> at R.K. Puram station from February to March in 2018. (c) Time series of particulate Cl measured by XRF and CIMS.

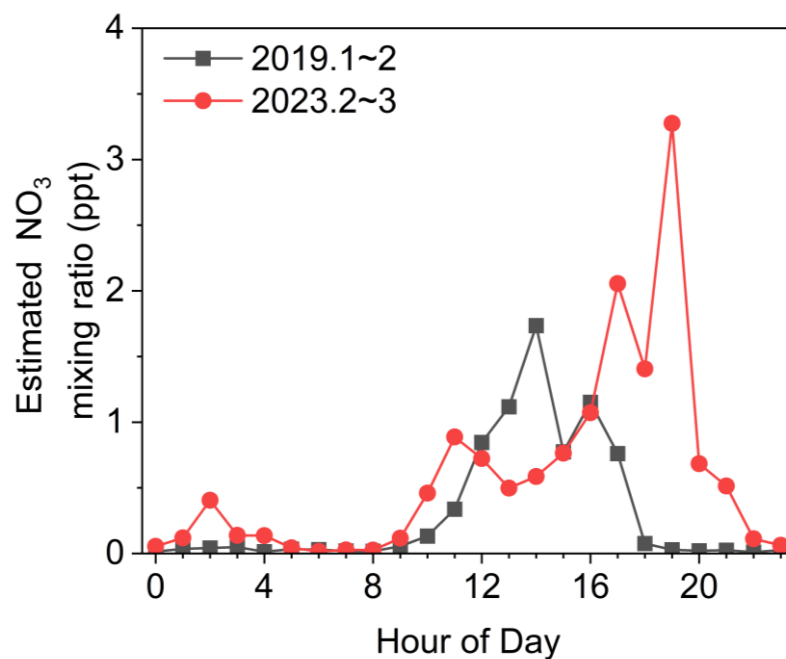

255

256 **Fig. S7 estimated  $\text{NO}_3$ · mixing ratios.** The  $\text{NO}_3$  mixing ratio was estimated by using  
 257 the observed  $\text{N}_2\text{O}_5$  and  $\text{NO}_2$  mixing ratio and the temperature-dependent equilibrium  
 258 constant between  $\text{NO}_2$ ,  $\text{NO}_3$ , and  $\text{N}_2\text{O}_5$ .

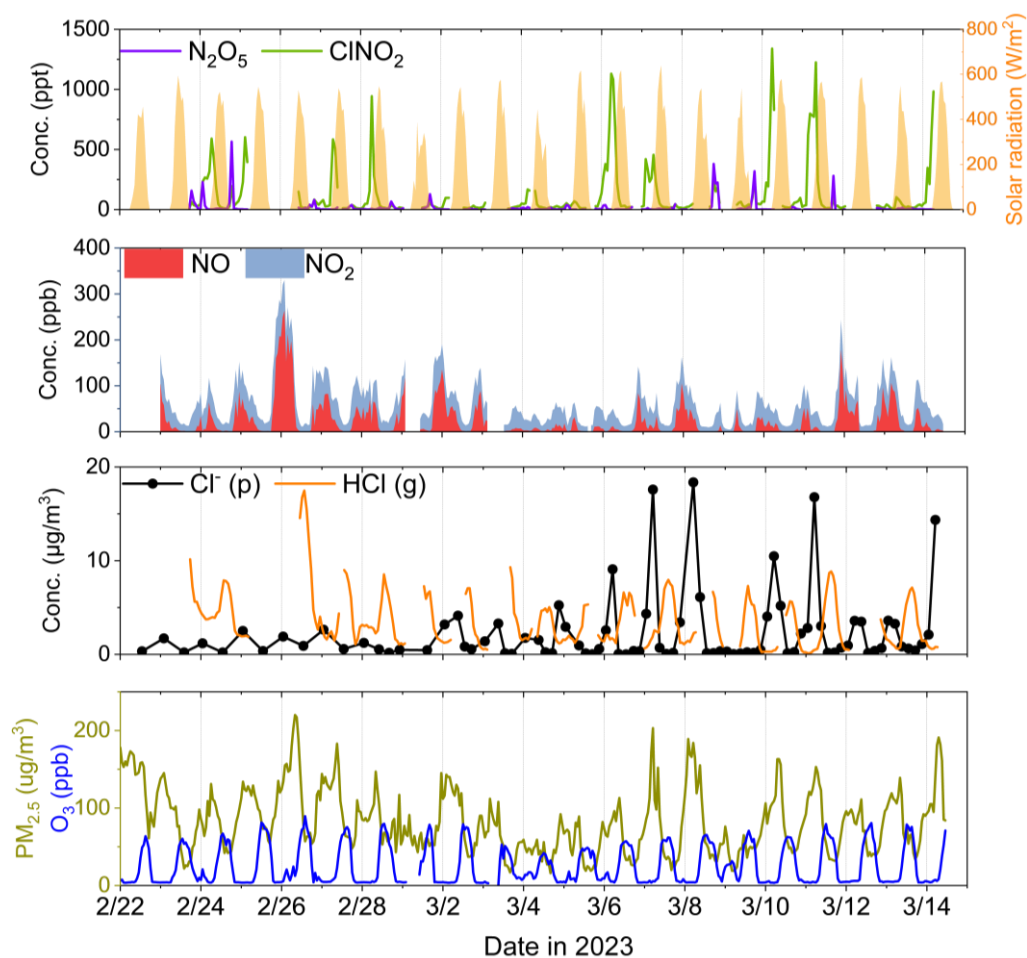

**Fig. S8 Overview of the field observations.** Time series of  $\text{N}_2\text{O}_5$ ,  $\text{ClONO}_2$ , solar radiation,  $\text{NO}$ ,  $\text{NO}_2$ , gaseous  $\text{HCl}$ ,  $\text{PM}_{2.5}$ , and  $\text{O}_3$ , and  $\text{Cl}$  element concentrations in  $\text{PM}_{2.5}$ .

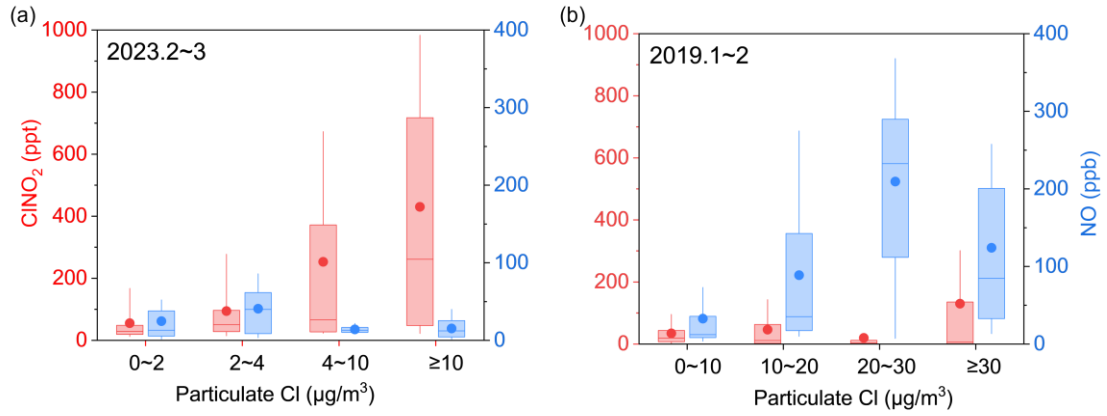

270

271 **Fig. S9 Dependence of nocturnal  $\text{ClNO}_2$  on chloride and NO during the (a) 2023**  
 272 **and (b) 2019 campaign.  $\text{ClNO}_2$  and NO were stratified by chloride concentration**  
 273 **intervals. Boxes and whiskers represent 25<sup>th</sup> and 75<sup>th</sup>, 10<sup>th</sup> and 90<sup>th</sup> percentiles,**  
 274 **respectively. The dots and lines inside the box denote average and median values.**

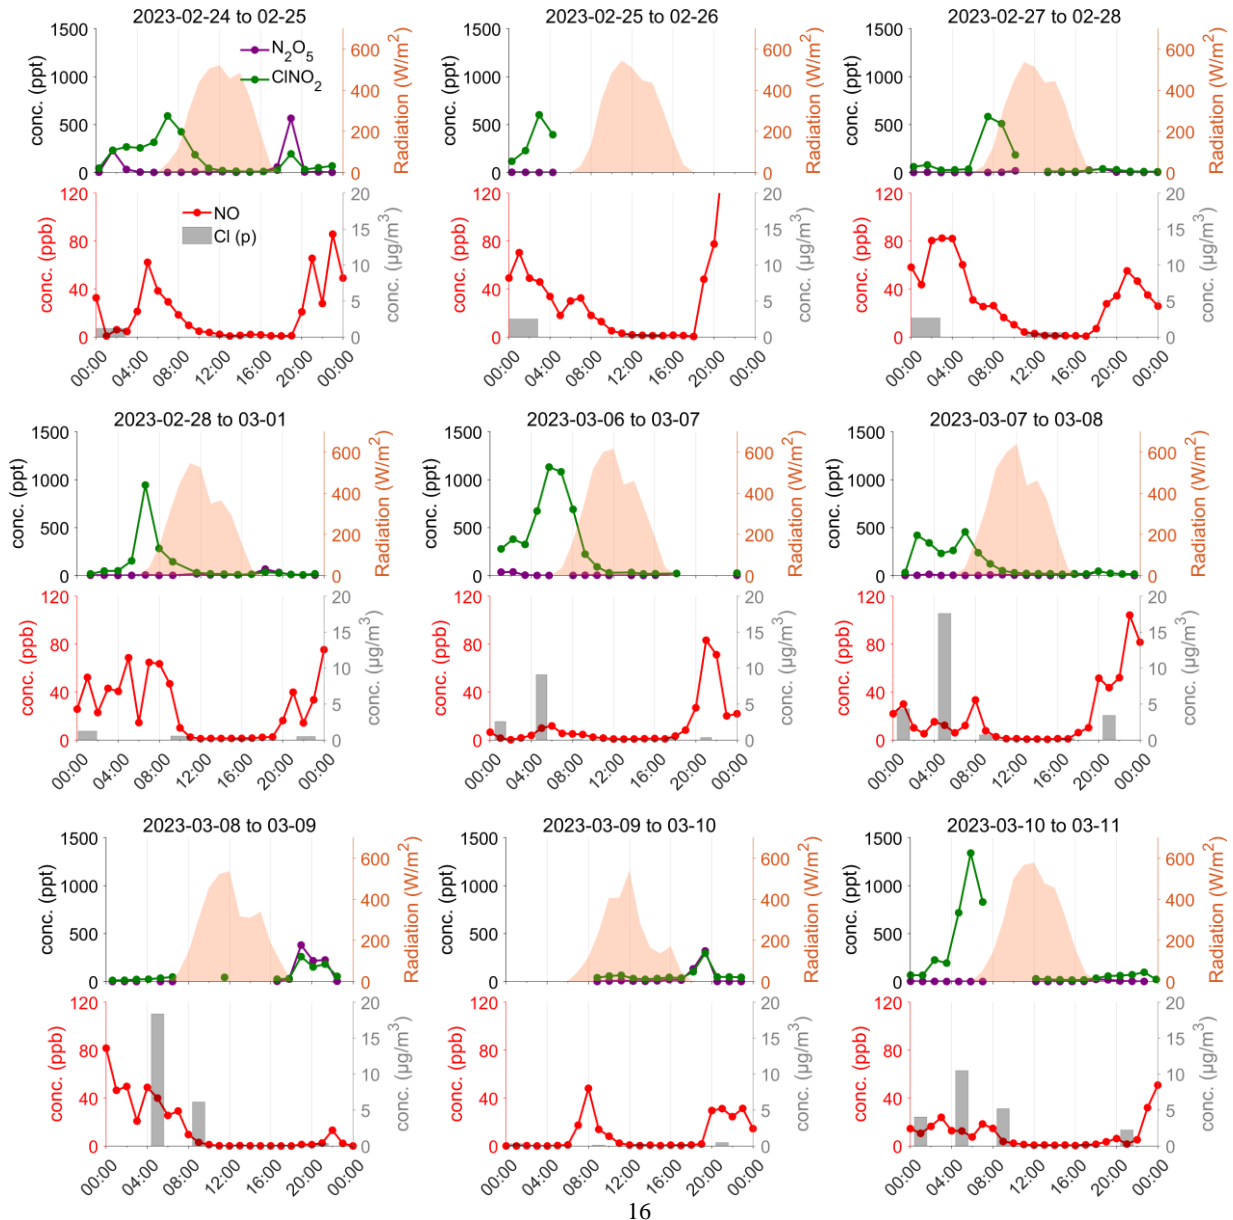



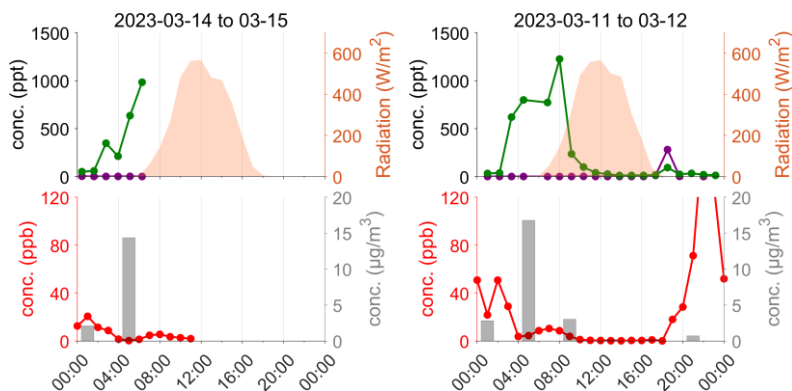

**Fig. S10 Day by day plots of the enhanced cases observed in 2023.** An enhanced case is identified by a pronounced nighttime increase in either  $\text{N}_2\text{O}_5$  or  $\text{ClONO}_2$ .

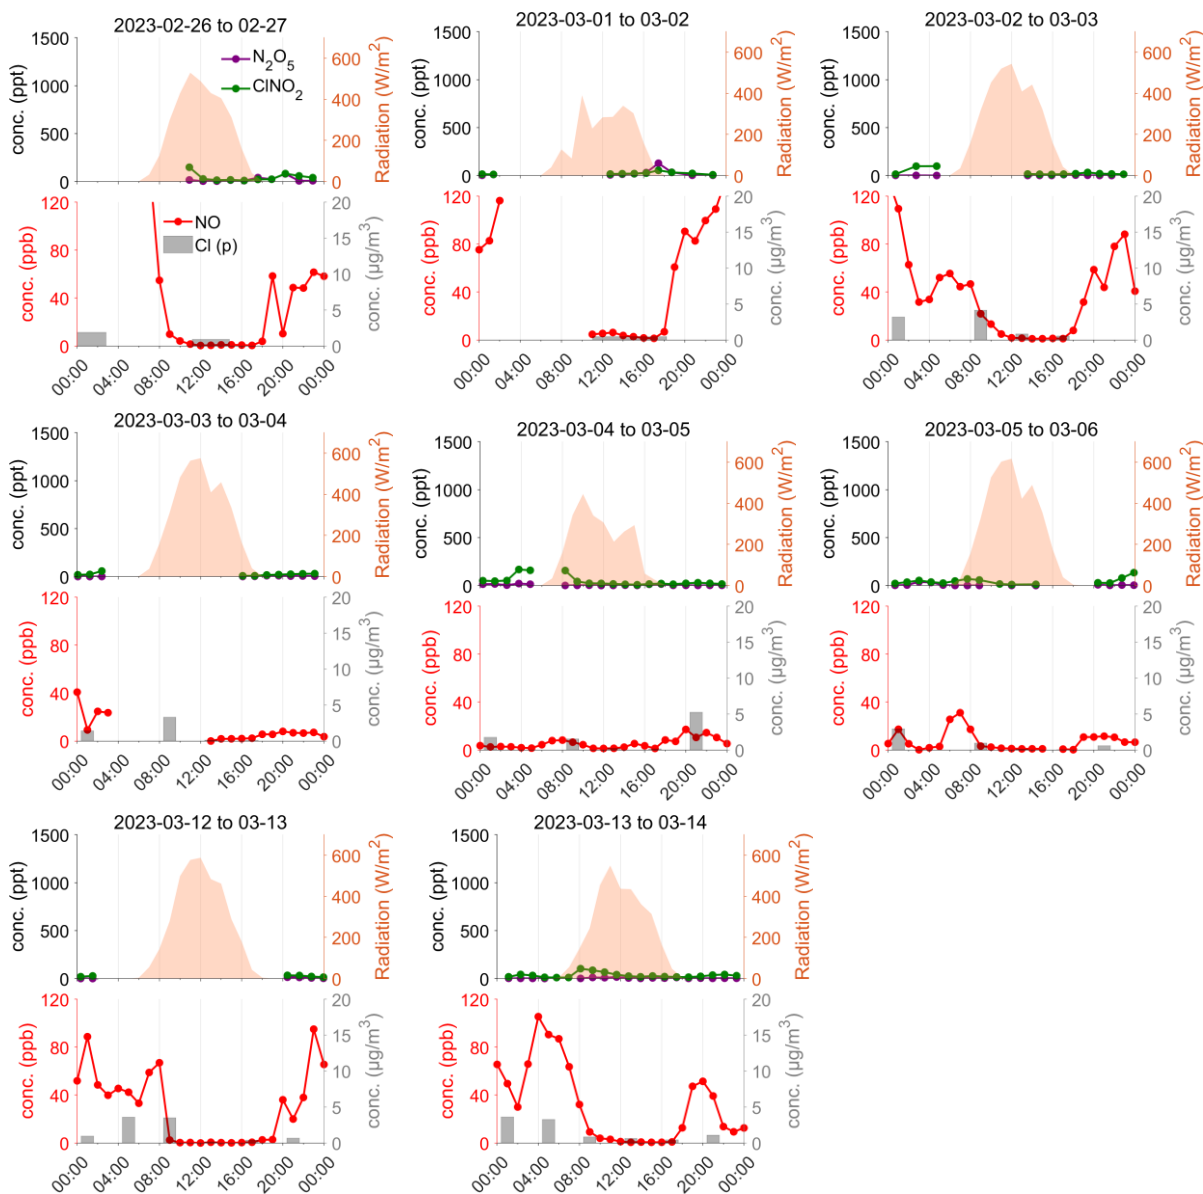

**Fig. S11 Day by day plots of the non-enhanced cases observed in 2023.** A non-

enhanced case is identified when neither  $\text{N}_2\text{O}_5$  nor  $\text{ClNO}_2$  shows a pronounced nighttime increase.

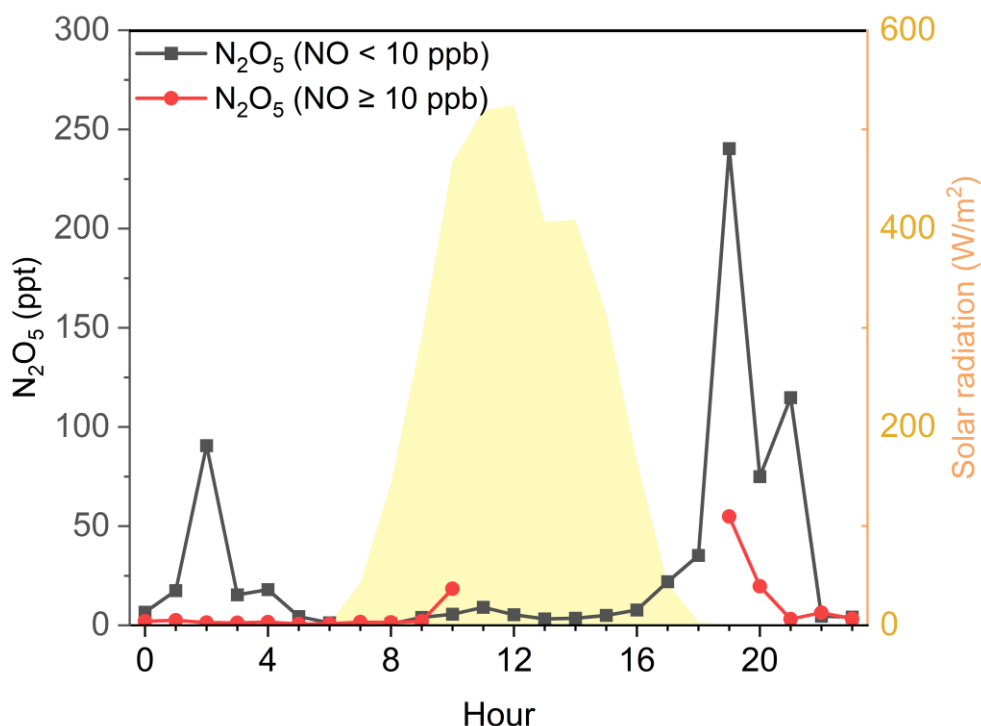

**Fig. S12 Average diurnal variations of (a)  $\text{N}_2\text{O}_5$  under low- and high-NO conditions (b)  $\text{PM}_{2.5}$ , total measured gaseous and particulate organics in 2023.** A 10 ppb of NO threshold was applied to ensure statistically robust and comparable datasets. As all NO concentrations were below 10 ppb between 11:00 and 18:00, no  $\text{N}_2\text{O}_5$  data are available for the high-NO condition during this period. The right axis in (b) shows the average solar radiation in 2023.

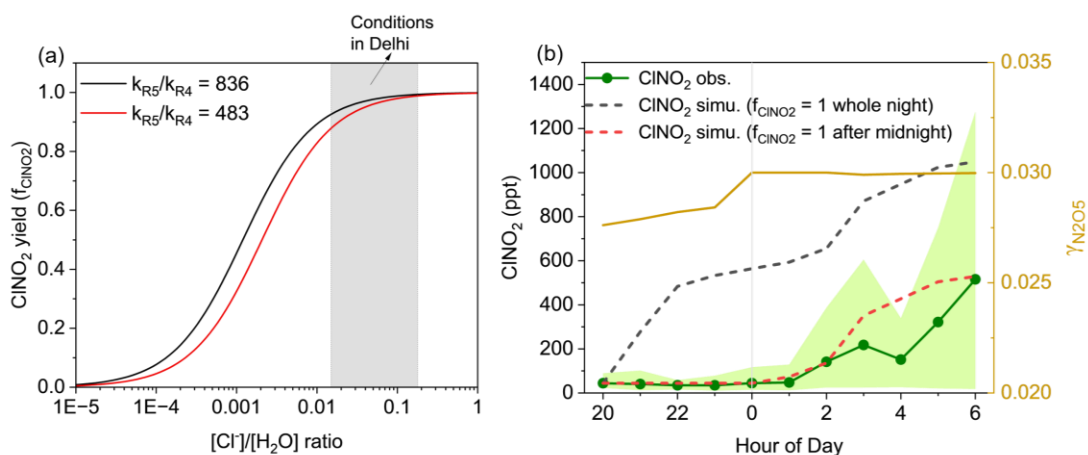

**Fig. S13 (a) Parameterization of  $\text{ClNO}_2$  yield and (b) simulation of the nocturnal  $\text{ClNO}_2$  variations.** The lines in (a) correspond to  $\text{ClNO}_2$  yield calculated using Eq. 3 with different reported reaction rate constant ratios. The grey shaded area indicates the 10<sup>th</sup> and 90<sup>th</sup> percentiles of the calculated  $[\text{Cl}^-]/[\text{H}_2\text{O}]$  ratios using ISOROPPIA from January to March of 2022 in Delhi (Ali et al., 2025). The green shaded area in (b) represents the 10<sup>th</sup> and 90<sup>th</sup> percentiles of the observed average nocturnal  $\text{ClNO}_2$  mixing ratios. The dashed lines in (b) are the simulated  $\text{ClNO}_2$  mixing ratios and the average RH parameterized  $\text{N}_2\text{O}_5$  uptake coefficient is shown in the right axis of (b).

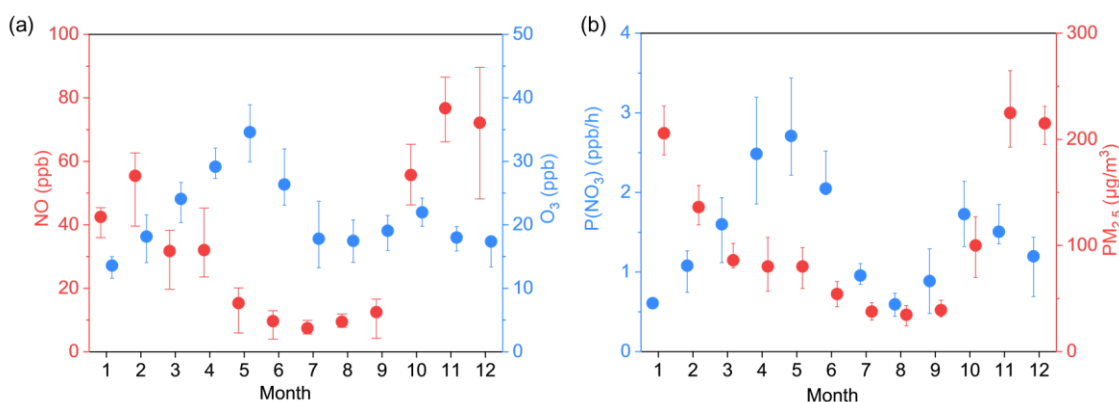

**Fig. S14 Monthly variations of NO, O<sub>3</sub>, P(NO<sub>3</sub>), and PM<sub>2.5</sub> in Delhi.** Average monthly variations of (a) NO and O<sub>3</sub> and (b) P(NO<sub>3</sub>) and PM<sub>2.5</sub> from 2017 to 2024. The dots represent the averages and the whiskers denote the 25<sup>th</sup> to 75<sup>th</sup> percentile ranges. All data were obtained from the R.K. Puram national monitoring station.

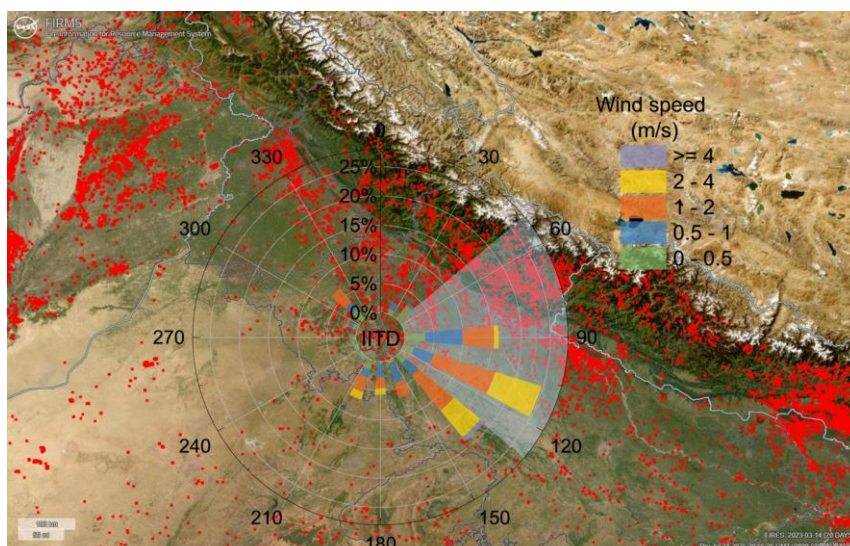

**Fig. S15 Satellite observations of active fire hotspots and wind rose plot during the 2023 campaign.** The map of the fire-points was downloaded from <https://earthdata.nasa.gov/firms>. The measurement site (IIT Delhi) was indicated as IITD. The light blue shaded area indicates the dominant wind-direction ( $50\sim 130^\circ$ ) when the extremely high values of the uptake parameter ( $\gamma \times f$ ) exceeding 0.1 were measured.

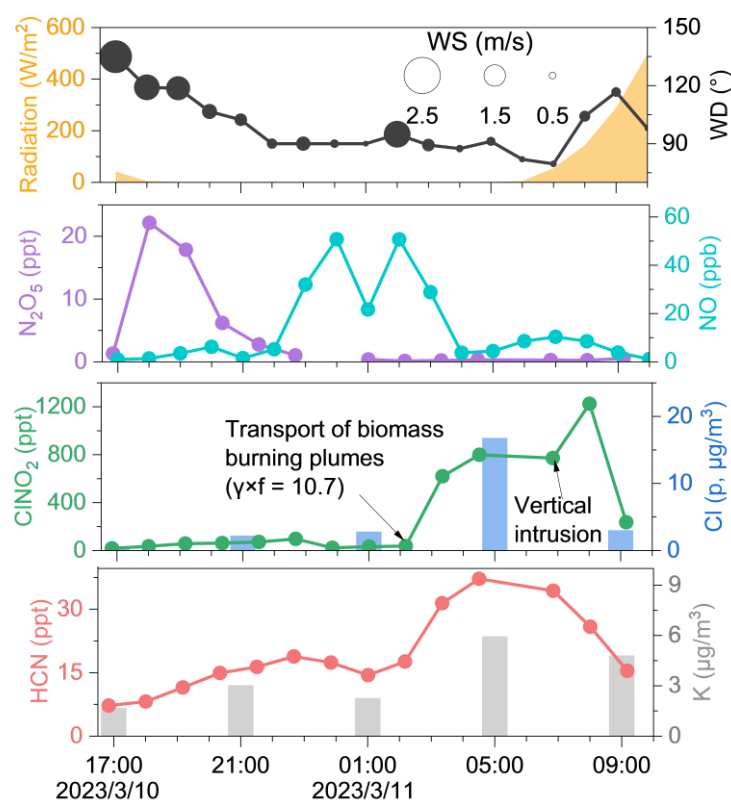

**Fig. S16 A case study indicating the influence of transport on the observed  $\text{ClNO}_2$  levels.** An exceptionally high  $\gamma \times f$  value (10.7) observed at 2023/3/11 2:10 is also noted.

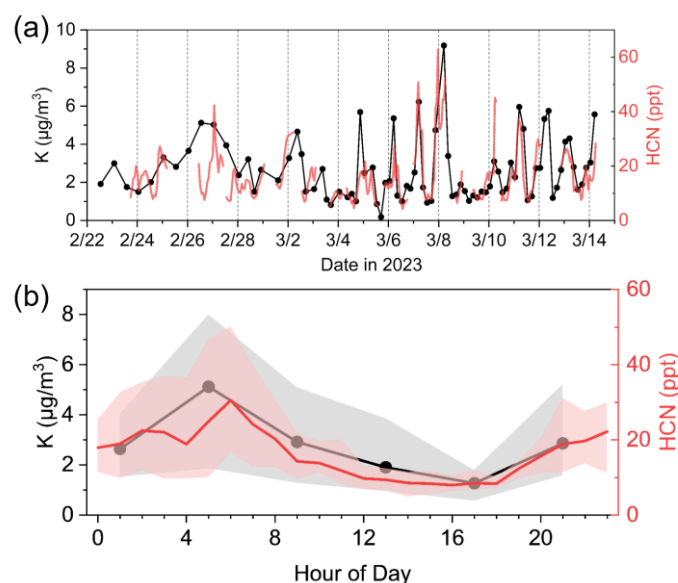

**Fig. S17 (a) Time series and (b) average diurnal pattern of element K and gaseous HCN during the 2023 campaign.** The shaded areas indicates 10<sup>th</sup> and 90<sup>th</sup> percentiles and the lines represent the campaign-averaged values. Hourly CIMS measurements were shown for HCN. The highest K and HCN concentrations on 3/7 and 3/8 were likely driven by large-scale bonfires involving wood and leaves burning during the Holika Dahan festival (3/6 16:00~3/8).

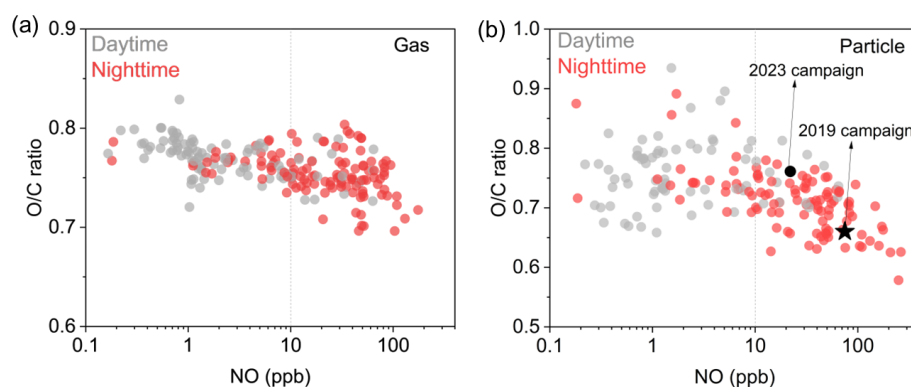

**Fig. S18 NO dependence of the gaseous and particulate bulk O/C ratio in Delhi.** Scatter plots showing the relationship between ambient NO levels and concentration-weighted bulk O/C ratios in the (a) gas and (b) particle phases.

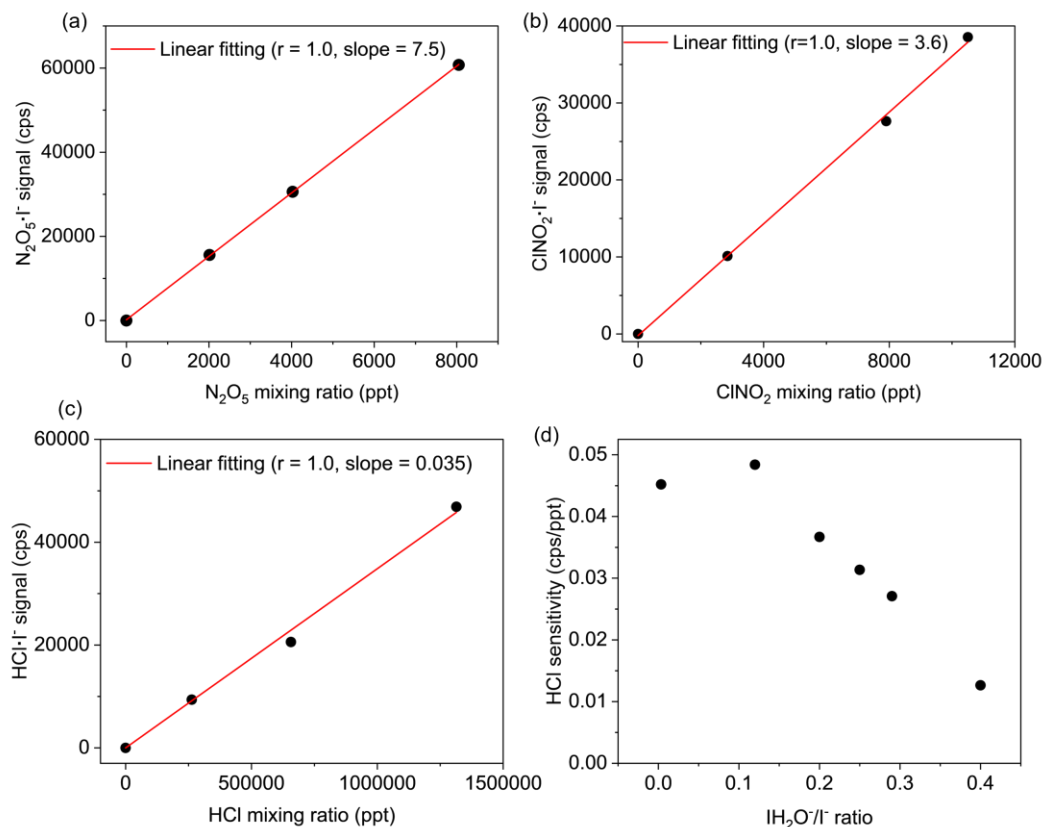

**Fig. S19 Sensitivity calibration of gaseous (a)  $\text{N}_2\text{O}_5$ , (b)  $\text{ClONO}_2$ , and (c) HCl and (d) water dependency of HCl sensitivity.** Multi-point calibrations for  $\text{N}_2\text{O}_5$  and  $\text{ClONO}_2$  were performed under RH conditions corresponding to an  $\text{IH}_2\text{O}^-$  to  $\text{I}^-$  ratio of  $0.42 \pm 0.02$ , while the calibration curve at an  $\text{I} \cdot \text{H}_2\text{O}^-$  to  $\text{I}^-$  ratio of 0.19 was shown for HCl.

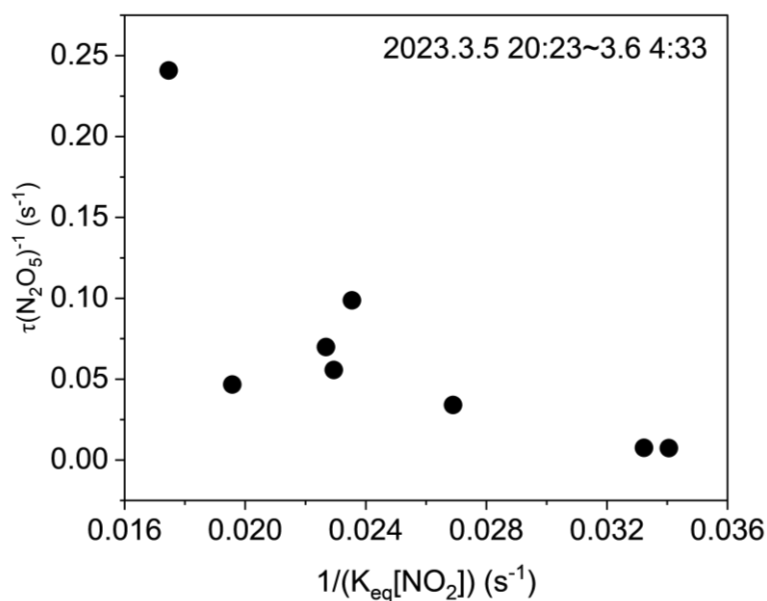

**Fig. S20 An example of the steady-state analysis of the  $\text{NO}_2$ - $\text{NO}_3$ - $\text{N}_2\text{O}_5$  system.**

## References

- Ali, U., Faisal, M., Ganguly, D., Kumar, M., and Singh, V.: Analysis of aerosol liquid water content and its role in visibility reduction in Delhi, *Science of The Total Environment*, 867, 161484, <https://doi.org/https://doi.org/10.1016/j.scitotenv.2023.161484>, 2023.
- Ali, U., Singh, V., Faisal, M., Kumar, M., and Gani, S.: Exploring the influence of physical and chemical factors on new particle formation in a polluted megacity, *Environmental Science: Atmospheres*, 5, 25-47, <https://doi.org/10.1039/D4EA00114A>, 2025.
- Andreae, M. O.: Emission of trace gases and aerosols from biomass burning – an updated assessment, *Atmos. Chem. Phys.*, 19, 8523-8546, <https://doi.org/10.5194/acp-19-8523-2019>, 2019.
- Baasandorj, M., Hoch, S. W., Bares, R., Lin, J. C., Brown, S. S., Millet, D. B., Martin, R., Kelly, K., Zarzana, K. J., Whiteman, C. D., Dube, W. P., Tonnesen, G., Jaramillo, I. C., and Sohl, J.: Coupling between Chemical and Meteorological Processes under Persistent Cold-Air Pool Conditions: Evolution of Wintertime PM<sub>2.5</sub> Pollution Events and N<sub>2</sub>O<sub>5</sub> Observations in Utah's Salt Lake Valley, *Environmental Science & Technology*, 51, 5941-5950, <https://doi.org/10.1021/acs.est.6b06603>, 2017.
- Bannan, T. J., Booth, A. M., Bacak, A., Muller, J. B. A., Leather, K. E., Le Breton, M., Jones, B., Young, D., Coe, H., Allan, J., Visser, S., Slowik, J. G., Furger, M., Prévôt, A. S. H., Lee, J., Dunmore, R. E., Hopkins, J. R., Hamilton, J. F., Lewis, A. C., Whalley, L. K., Sharp, T., Stone, D., Heard, D. E., Fleming, Z. L., Leigh, R., Shallcross, D. E., and Percival, C. J.: The first UK measurements of nitryl chloride using a chemical ionization mass spectrometer in central London in the summer of 2012, and an investigation of the role of Cl atom oxidation, *Journal of Geophysical Research: Atmospheres*, 120, 5638-5657, <https://doi.org/10.1002/2014jd022629>, 2015.
- Behnke, W., George, C., Scheer, V., and Zetzsch, C.: Production and decay of ClNO<sub>2</sub> from the reaction of gaseous N<sub>2</sub>O<sub>5</sub> with NaCl solution: Bulk and aerosol experiments, *Journal of Geophysical Research: Atmospheres*, 102, 3795-3804, <https://doi.org/https://doi.org/10.1029/96JD03057>, 1997.
- Bertram, T. H., and Thornton, J. A.: Toward a general parameterization of N<sub>2</sub>O<sub>5</sub> reactivity on aqueous particles: the competing effects of particle liquid water, nitrate and chloride, *Atmos. Chem. Phys.*, 9, 8351-8363, <https://doi.org/10.5194/acp-9-8351-2009>, 2009.
- Bertram, T. H., Thornton, J. A., and Riedel, T. P.: An experimental technique for the direct measurement of N<sub>2</sub>O<sub>5</sub> reactivity on ambient particles, *Atmos. Meas. Tech.*, 2, 231-242, <https://doi.org/10.5194/amt-2-231-2009>, 2009.
- Brown, S. S., Stark, H., and Ravishankara, A. R.: Applicability of the steady state approximation to the interpretation of atmospheric observations of NO<sub>3</sub> and N<sub>2</sub>O<sub>5</sub>, *Journal of Geophysical Research: Atmospheres*, 108, <https://doi.org/https://doi.org/10.1029/2003JD003407>, 2003.



373 Brown, S. S., Ryerson, T. B., Wollny, A. G., Brock, C. A., Peltier, R., Sullivan, A. P.,  
 374 Weber, R. J., Dubé, W. P., Trainer, M., Meagher, J. F., Fehsenfeld, F. C., and  
 375 Ravishankara, A. R.: Variability in Nocturnal Nitrogen Oxide Processing and Its Role  
 376 in Regional Air Quality, *Science*, 311, 67-70,  
 377 <https://doi.org/doi:10.1126/science.1120120>, 2006.  
 378 Chen, X., Xia, M., Wang, W., Yun, H., Yue, D., and Wang, T.: Fast near-surface ClNO<sub>2</sub>  
 379 production and its impact on O<sub>3</sub> formation during a heavy pollution event in South  
 380 China, *Sci Total Environ*, 858, 159998, <https://doi.org/10.1016/j.scitotenv.2022.159998>,  
 381 2023.  
 382 Chen, X., Jiang, Y., Zong, Z., Wang, Y., Sun, W., Wang, Y., Xia, M., Guan, L., Liu, P.,  
 383 Zhang, C., Chen, J., Mu, Y., and Wang, T.: Atmospheric Reactive Halogens Reshaped  
 384 by the Clean Energy Policy and Agricultural Activity in a Rural Area of the North China  
 385 Plain, *Environmental Science & Technology*, <https://doi.org/10.1021/acs.est.4c13986>,  
 386 2025.  
 387 Eger, P. G., Friedrich, N., Schuladen, J., Shenolikar, J., Fischer, H., Tadic, I., Harder,  
 388 H., Martinez, M., Rohloff, R., Tauer, S., Drewnick, F., Fachinger, F., Brooks, J.,  
 389 Darbyshire, E., Sciare, J., Pikridas, M., Lelieveld, J., and Crowley, J. N.: Shipborne  
 390 measurements of ClNO<sub>2</sub> in the Mediterranean Sea and around the Arabian Peninsula  
 391 during summer, *Atmospheric Chemistry and Physics*, 19, 12121-12140,  
 392 <https://doi.org/10.5194/acp-19-12121-2019>, 2019.  
 393 Faisal, M., Ali, U., Kumar, A., Kumar, M., and Singh, V.: Unveiling PM<sub>2.5</sub> sources:  
 394 Double and tracer conjugate PMF approaches for high-resolution organic, BC, and  
 395 inorganic PM<sub>2.5</sub> data, *Atmospheric Environment*, 343, 121011,  
 396 <https://doi.org/https://doi.org/10.1016/j.atmosenv.2024.121011>, 2025.  
 397 Finlayson-Pitts, B. J.: The Tropospheric Chemistry of Sea Salt: A Molecular-Level  
 398 View of the Chemistry of NaCl and NaBr, *Chemical Reviews*, 103, 4801-4822,  
 399 <https://doi.org/10.1021/cr020653t>, 2003.  
 400 Gani, S., Bhandari, S., Seraj, S., Wang, D. S., Patel, K., Soni, P., Arub, Z., Habib, G.,  
 401 Hildebrandt Ruiz, L., and Apte, J. S.: Submicron aerosol composition in the world's  
 402 most polluted megacity: the Delhi Aerosol Supersite study, *Atmos. Chem. Phys.*, 19,  
 403 6843-6859, <https://doi.org/10.5194/acp-19-6843-2019>, 2019.  
 404 Gani, S., Bhandari, S., Patel, K., Seraj, S., Soni, P., Arub, Z., Habib, G., Hildebrandt  
 405 Ruiz, L., and Apte, J. S.: Particle number concentrations and size distribution in a  
 406 polluted megacity: the Delhi Aerosol Supersite study, *Atmos. Chem. Phys.*, 20, 8533-  
 407 8549, <https://doi.org/10.5194/acp-20-8533-2020>, 2020.  
 408 Haslett, S. L., Bell, D. M., Kumar, V., Slowik, J. G., Wang, D. S., Mishra, S., Rastogi,  
 409 N., Singh, A., Ganguly, D., Thornton, J., Zheng, F., Li, Y., Nie, W., Liu, Y., Ma, W., Yan,  
 410 C., Kulmala, M., Daellenbach, K. R., Hadden, D., Baltensperger, U., Prevot, A. S. H.,  
 411 Tripathi, S. N., and Mohr, C.: Nighttime NO emissions strongly suppress chlorine and  
 412 nitrate radical formation during the winter in Delhi, *Atmos. Chem. Phys.*, 23, 9023-9036,  
 413 <https://doi.org/10.5194/acp-23-9023-2023>, 2023.  
 414 Lalchandani, V., Kumar, V., Tobler, A., M. Thamban, N., Mishra, S., Slowik, J. G.,



Bhattu, D., Rai, P., Satish, R., Ganguly, D., Tiwari, S., Rastogi, N., Tiwari, S., Močnik, G., Prévôt, A. S. H., and Tripathi, S. N.: Real-time characterization and source apportionment of fine particulate matter in the Delhi megacity area during late winter, *Science of The Total Environment*, 770, 145324, <https://doi.org/https://doi.org/10.1016/j.scitotenv.2021.145324>, 2021.

Lanz, V. A., Prévôt, A. S. H., Alfarra, M. R., Weimer, S., Mohr, C., DeCarlo, P. F., Gianini, M. F. D., Hueglin, C., Schneider, J., Favez, O., D'Anna, B., George, C., and Baltensperger, U.: Characterization of aerosol chemical composition with aerosol mass spectrometry in Central Europe: an overview, *Atmos. Chem. Phys.*, 10, 10453-10471, <https://doi.org/10.5194/acp-10-10453-2010>, 2010.

Lee, B. H., Lopez-Hilfiker, F. D., Mohr, C., Kurten, T., Worsnop, D. R., and Thornton, J. A.: An iodide-adduct high-resolution time-of-flight chemical-ionization mass spectrometer: application to atmospheric inorganic and organic compounds, *Environ Sci Technol*, 48, 6309-6317, <https://doi.org/10.1021/es500362a>, 2014.

Li, J., Zhai, T., Chen, X., Wang, H., Xie, S., Chen, S., Li, C., Gong, Y., Dong, H., and Lu, K.: Direct measurement of N<sub>2</sub>O<sub>5</sub> heterogeneous uptake coefficients on atmospheric aerosols in southwestern China and evaluation of current parameterizations, *Atmos. Chem. Phys.*, 25, 6395-6406, <https://doi.org/10.5194/acp-25-6395-2025>, 2025.

Mandariya, A. K., Ahlawat, A., Haneef, M., Baig, N. A., Patel, K., Apte, J., Hildebrandt Ruiz, L., Wiedensohler, A., and Habib, G.: Measurement report: Hygroscopicity of size-selected aerosol particles in the heavily polluted urban atmosphere of Delhi: impacts of chloride aerosol, *Atmos. Chem. Phys.*, 24, 3627-3647, <https://doi.org/10.5194/acp-24-3627-2024>, 2024.

McNamara, S. M., Kolesar, K. R., Wang, S., Kirpes, R. M., May, N. W., Gunch, M. J., Cook, R. D., Fuentes, J. D., Hornbrook, R. S., Apel, E. C., China, S., Laskin, A., and Pratt, K. A.: Observation of Road Salt Aerosol Driving Inland Wintertime Atmospheric Chlorine Chemistry, *ACS Cent Sci*, 6, 684-694, <https://doi.org/10.1021/acscentsci.9b00994>, 2020.

Mielke, L. H., Stutz, J., Tsai, C., Hurlock, S. C., Roberts, J. M., Veres, P. R., Froyd, K. D., Hayes, P. L., Cubison, M. J., Jimenez, J. L., Washenfelder, R. A., Young, C. J., Gilman, J. B., Gouw, J. A., Flynn, J. H., Grossberg, N., Lefer, B. L., Liu, J., Weber, R. J., and Osthoff, H. D.: Heterogeneous formation of nitryl chloride and its role as a nocturnal NO<sub>x</sub> reservoir species during CalNex - LA 2010, *Journal of Geophysical Research: Atmospheres*, 118, 10638-10652, <https://doi.org/10.1002/jgrd.50783>, 2013.

Osthoff, H. D., Roberts, J. M., Ravishankara, A. R., Williams, E. J., Lerner, B. M., Sommariva, R., Bates, T. S., Coffman, D., Quinn, P. K., Dibb, J. E., Stark, H., Burkholder, J. B., Talukdar, R. K., Meagher, J., Fehsenfeld, F. C., and Brown, S. S.: High levels of nitryl chloride in the polluted subtropical marine boundary layer, *Nature Geoscience*, 1, 324-328, <https://doi.org/10.1038/ngeo177>, 2008.

Phillips, G. J., Tang, M. J., Thieser, J., Brickwedde, B., Schuster, G., Bohn, B., Lelieveld, J., and Crowley, J. N.: Significant concentrations of nitryl chloride observed in rural continental Europe associated with the influence of sea salt chloride and

anthropogenic emissions, *Geophysical Research Letters*, 39, n/a-n/a, <https://doi.org/10.1029/2012gl051912>, 2012.

Priestley, M., le Breton, M., Bannan, T. J., Worrall, S. D., Bacak, A., Smedley, A. R. D., Reyes-Villegas, E., Mehra, A., Allan, J., Webb, A. R., Shallcross, D. E., Coe, H., and Percival, C. J.: Observations of organic and inorganic chlorinated compounds and their contribution to chlorine radical concentrations in an urban environment in northern Europe during the wintertime, *Atmospheric Chemistry and Physics*, 18, 13481-13493, <https://doi.org/10.5194/acp-18-13481-2018>, 2018.

Sarwar, G., Simon, H., Bhawe, P., and Yarwood, G.: Examining the impact of heterogeneous nitryl chloride production on air quality across the United States, *Atmos. Chem. Phys.*, 12, 6455-6473, <https://doi.org/10.5194/acp-12-6455-2012>, 2012.

Stockwell, C. E., Yokelson, R. J., Kreidenweis, S. M., Robinson, A. L., DeMott, P. J., Sullivan, R. C., Reardon, J., Ryan, K. C., Griffith, D. W. T., and Stevens, L.: Trace gas emissions from combustion of peat, crop residue, domestic biofuels, grasses, and other fuels: configuration and Fourier transform infrared (FTIR) component of the fourth Fire Lab at Missoula Experiment (FLAME-4), *Atmos. Chem. Phys.*, 14, 9727-9754, <https://doi.org/10.5194/acp-14-9727-2014>, 2014.

Stockwell, C. E., Christian, T. J., Goetz, J. D., Jayarathne, T., Bhawe, P. V., Praveen, P. S., Adhikari, S., Maharjan, R., DeCarlo, P. F., Stone, E. A., Saikawa, E., Blake, D. R., Simpson, I. J., Yokelson, R. J., and Panday, A. K.: Nepal Ambient Monitoring and Source Testing Experiment (NAMaSTE): emissions of trace gases and light-absorbing carbon from wood and dung cooking fires, garbage and crop residue burning, brick kilns, and other sources, *Atmos. Chem. Phys.*, 16, 11043-11081, <https://doi.org/10.5194/acp-16-11043-2016>, 2016.

Tham, Y. J., Wang, Z., Li, Q., Yun, H., Wang, W., Wang, X., Xue, L., Lu, K., Ma, N., Bohn, B., Li, X., Kecorius, S., Größ, J., Shao, M., Wiedensohler, A., Zhang, Y., and Wang, T.: Significant concentrations of nitryl chloride sustained in the morning: investigations of the causes and impacts on ozone production in a polluted region of northern China, *Atmospheric Chemistry and Physics*, 16, 14959-14977, <https://doi.org/10.5194/acp-16-14959-2016>, 2016.

Tham, Y. J., Wang, Z., Li, Q., Wang, W., Wang, X., Lu, K., Ma, N., Yan, C., Kecorius, S., Wiedensohler, A., Zhang, Y., and Wang, T.: Heterogeneous N<sub>2</sub>O<sub>5</sub> uptake coefficient and production yield of ClNO<sub>2</sub> in polluted northern China: roles of aerosol water content and chemical composition, *Atmos. Chem. Phys.*, 18, 13155-13171, <https://doi.org/10.5194/acp-18-13155-2018>, 2018.

Thornton, J. A., Kercher, J. P., Riedel, T. P., Wagner, N. L., Cozic, J., Holloway, J. S., Dube, W. P., Wolfe, G. M., Quinn, P. K., Middlebrook, A. M., Alexander, B., and Brown, S. S.: A large atomic chlorine source inferred from mid-continental reactive nitrogen chemistry, *Nature*, 464, 271-274, <https://doi.org/10.1038/nature08905>, 2010.

Vohra, K., S, M., Chakraborty, A., Shah, H., As, B., and Pakki, J.: Urgent issues regarding real-time air quality monitoring data in India: Unveiling solutions and implications for policy and health, *Atmospheric Environment: X*, 25, 100308,

<https://doi.org/https://doi.org/10.1016/j.aeaoa.2024.100308>, 2025.

Wang, C., Liggio, J., Wentzell, J. J. B., Jorga, S., Folkerson, A., and Abbatt, J. P. D.: Chloramines as an important photochemical source of chlorine atoms in the urban atmosphere, *Proceedings of the National Academy of Sciences*, 120, e2220889120, <https://doi.org/doi:10.1073/pnas.2220889120>, 2023.

Wang, T., Brown, S. S., Dubé, W. P., Tham, Y. J., Zha, Q., Xue, L., Poon, S., Wang, Z., Blake, D. R., Tsui, W., and Parrish, D. D.: Observations of nitryl chloride and modeling its source and effect on ozone in the planetary boundary layer of southern China, *Journal of Geophysical Research: Atmospheres*, 121, 2457-2475, <https://doi.org/10.1002/2015jd024566>, 2016.

Wang, X., Wang, H., Xue, L., Wang, T., Wang, L., Gu, R., Wang, W., Tham, Y. J., Wang, Z., Yang, L., Chen, J., and Wang, W.: Observations of N<sub>2</sub>O<sub>5</sub> and ClNO<sub>2</sub> at a polluted urban surface site in North China: High N<sub>2</sub>O<sub>5</sub> uptake coefficients and low ClNO<sub>2</sub> product yields, *Atmospheric Environment*, 156, 125-134, <https://doi.org/10.1016/j.atmosenv.2017.02.035>, 2017a.

Wang, Z., Wang, W., Tham, Y. J., Li, Q., Wang, H., Wen, L., Wang, X., and Wang, T.: Fast heterogeneous N<sub>2</sub>O<sub>5</sub> uptake and ClNO<sub>2</sub> production in power plant and industrial plumes observed in the nocturnal residual layer over the North China Plain, *Atmos. Chem. Phys.*, 17, 12361-12378, <https://doi.org/10.5194/acp-17-12361-2017>, 2017b.

Xia, M., Peng, X., Wang, W., Yu, C., Sun, P., Li, Y., Liu, Y., Xu, Z., Wang, Z., Xu, Z., Nie, W., Ding, A., and Wang, T.: Significant production of ClNO<sub>2</sub> and possible source of Cl<sub>2</sub> from N<sub>2</sub>O<sub>5</sub> uptake at a suburban site in eastern China, *Atmospheric Chemistry and Physics*, 20, 6147-6158, <https://doi.org/10.5194/acp-20-6147-2020>, 2020.

Xia, M., Peng, X., Wang, W., Yu, C., Wang, Z., Tham, Y. J., Chen, J., Chen, H., Mu, Y., Zhang, C., Liu, P., Xue, L., Wang, X., Gao, J., Li, H., and Wang, T.: Winter ClNO<sub>2</sub> formation in the region of fresh anthropogenic emissions: seasonal variability and insights into daytime peaks in northern China, *Atmospheric Chemistry and Physics*, 21, 15985-16000, <https://doi.org/10.5194/acp-21-15985-2021>, 2021.

Xie, Y., Zhou, M., Hunt, K. M. R., and Mauzerall, D. L.: Recent PM<sub>2.5</sub> air quality improvements in India benefited from meteorological variation, *Nature Sustainability*, <https://doi.org/10.1038/s41893-024-01366-y>, 2024.
